# Supplementary material
Source: publisher site journal article supplement (https://www.dovepress.com/article/207989)
Supplement: Supplementary file 1 [file get_supplementary_file.php]

**Supplementary**

**Table A1 Univariable analysis**

| **Variables** | **Regression coefficient** | **95% CI** |
| --- | --- | --- |
| Age (years)  Sex  Female  Male  Level of Education  College or University  Secondary School  Primary School or None  Other  Missing  Marital Status  Married or Common Law  Divorced or Separated  Never Married  Widowed  Other  Missing  Employment  Full time  Part-time  Retired  On disability  Other  Missing  Social Assistance  No  Yes  Missing  Private Insurance  Yes  No  Missing  Ethnicity  Caucasian  Black  Asian  Hispanic  Other  Missing  StartT Back  Low  Medium  High  Missing  Functional status (ODI, change of 10 units)  Baseline  Difference (6 month - Baseline)  Pain severity (BPI, change of 1 unit)  Baseline  Difference (6 month - Baseline)  Pain interference (BPI, change of 1 unit)  Baseline  Difference (6 month - Baseline)  Physical health status (SF-12, change of 10 units)  Baseline  Difference (6 month - Baseline)  Mental health status (SF-12, change of 10 units)  Baseline  Difference (6 month - Baseline)  Anxiety (HADS, change of 1 unit)  Baseline  Difference (6 month - Baseline)  Depression (PHQ-9, change of 1 unit)  Baseline  Difference (6 month - Baseline)  Site  A  B  C  D  Number of visits with nurse (change of 1 unit)  Number of visits with physician (change of 1 unit)  Number of visits with physiotherapist (change of 1 unit)  Number of visits with psychologist (change of 1 unit)  Number of months of implementation (c. of 12 units)  Team climate inventory (TCI, change of 1 unit))  Adherence to program (based on visits with nurse)  No  Yes  Adherence to program (based on visits with physiotherapist)  No  Yes  Interdisciplinary evaluation  No  Yes | -0.025  Reference  -0.174  Reference  0.136  0.108  0.577  0.085  Reference  -0.118  0.638  0.234  2.023  -0.130  Reference  -0.275  -0.544  -0.325  -0.472  -0.359  Reference  -0.604  -0.103  Reference  -0.160  0.113  Reference  0.508  -1.003  2.593  0.054  0.144  Reference  -0.085  -0.145  -0.251  -0.114  -0.086  0.011  -0.006  -0.002  -0.022  0.080  0.249  0.109  -0.026  -0.028  -0.058  0.003  -0.018  Reference  0.125  0.995  0.214  0.044  0.096  0.078  0.093  -0.247  -0.165  Reference  0.768  Reference  -0.206  Reference  0.017 | -0.038, -0.011  -0.579, 0.231  -0.372, 0.644  -1.269, 1.485  -0.347, 1.500  -0.594, 0.764  -0.666, 0.431  -0.002, 1.278  -1.393, 1.860  0.397, 3.649  -0.811, 0.550  -1.159, 0.610  -1.053, -0.036  -1.209, 0.559  -1.099, 0.154  -1.105, 0.388  -1.370, 0.162  -0.741, 0.535  -0.628, 0.309  -0.510, 0.736  -0.538, 1.554  -1.963, -0.043  0.310, 4.875  -0.624, 0.733  -0.360, 0.649  -0.601, 0.431  -0.679, 0.389  -1.083, 0.582  -0.261, 0.034  -0.214, 0.043  -0.100, 0.122  -0.116, 0.105  -0.097, 0.093  -0.120, 0.076  -0.159, 0.320  0.029, 0.470  -0.084, 0.303  -0.250, 0.197  -0.082, 0.027  -0.121, 0.005  -0.032, 0.039  -0.058, 0.022  -0.387, 0.637  0.368, 1.621  -0.371, 0.799  -0.089, 0.176  -0.058, 0.250  -0.137, 0.293  -0.019, 0.206  -0.453, -0.040  -1.007, 0.677  0.123, 1.413  -0.722, 0.310  -0.509, 0.542 |

**Table A2 Multivariable models for change PACIC score**

| **Variables** | **Model a**  **Coef. (95% CI)**  **N=116, R2 =0.115** | **Model b**  **Coef. (95% CI)**  **N=110, R2 = 0.124** | **Model c**  **Coef. (95% CI)**  **N= 92, R2 = 0.073** |
| --- | --- | --- | --- |
| ***Patient predisposing factors***  Age (years)  Marital Status  Married or Common Law  Divorced or Separated  Never Married  Widowed  Other  Missing  Employment  Full time  Part-time  Retired  On disability  Other  Missing  Ethnicity  Caucasian  Black  Asian  Hispanic  Other  Missing  ***Environmental factors***  Site  A  B  C  D  Adherence to program (based on visits with nurse)  No  Yes  Number of months of implementation  ***Patient health status***  Physical health status (Baseline) | -0.017 (-0.038, 0.004)  Reference  -0.078 (-0.620, 0.464)  0.442 (-0.252, 1.135)  0.490 (-1.141, 2.121)  1.205 (-0.490, 2.900)  -1.719 (-4.064, 0.626)  Reference  -0.276 (-1.129, 0.577)  -0.119 (-0.790, 0.552)  -0.157 (-1.004, 0.690)  -0.432 (-1.115, 0.251)  1.259 (-1.114, 3.633)  Reference  0.351 (-0.736, 1.438)  -0.837 (-1.791, 0.117)  2.589 (0.271, 4.907)  -0.151 (-0.859, 0.557)  0.309 (-0.341, 0.959) | -0.016 (-0.037, 0.006)  Reference  -0.150 (-0.697, 0.397)  0.533 (-0.188, 1.255)  0.427 (-1.233, 2.087)  0.535 (-1.293, 2.363)  -1.581 (-3.980, 0.819)  Reference  -0.075 (-0.957, 0.807)  -0.107 (-0.785, 0.570)  -0.133 (-0.978, 0.722)  -0.412 (-1.093, 0.270)  1.424 (-0.990, 3.837)  Reference  0.413 (-0.697, 1.523)  -0.690 (-1.669, 0.289)  2.792 (0.462, 5.121)  -0.112 (-0.834, 0.610)  0.182 (-0.505, 0.870)  Reference  0.151 (-0.490, 0.792)  1.173 (-0.352, 2.697)  0.243 (-0.738, 1.224)  Reference  -0.427 (-1.709, 0.856)  -0.004 (-0.422, 0.413) | -0.021 (-0.046, 0.004)  Reference  -0.149 (-0.771, 0.472)  0.305 (-0.528, 1.138)  0.359 (-1.396, 2.114)  0.479 (-1.529, 2.487)  -1.679 (-4.269, 0.911)  Reference  -0.142 (-1.078, 0.794)  -0.008 (-0.796, 0.779)  0.104 (-0.990, 1.199)  -0.368 (-1.208, 0.472)  1.472 (-1.084, 4.027)  Reference  0.047 (-1.326, 1.419)  -1.209 (-2.488, 0.071)  NE  -0.192 (-0.977, 0.593)  0.139 (-0.621, 0.899)  Reference  0.177 (-0.560, 0.913)  0.986 (-0.821, 2.793)  0.335 (-0.758, 1.427)  Reference  -0.301 (-1.864, 1.263)  0.025 (-0.447, 0.497)  0.038 (-0.216, 0.292) |

Abbreviation: NE, not estimated.
